# Supplementary material for: A Series of Imidazole Derivatives: Synthesis, Two-Photon Absorption, and Application for Bioimaging
Source: Hindawi journal article supplement (doi:10.1155/2015/965386), 2015-01-01
Supplement: f1 [file 965386.f1.pdf]

## Supporting Information

|                                                                                                                                                                                     |   |
|-------------------------------------------------------------------------------------------------------------------------------------------------------------------------------------|---|
| Table S1. The crystal data collection and the refinement parameters of T-1 and T-3..                                                                                                | 2 |
| Figure S1. The crystal structures of T-1(left) and T-3(right). H atoms, anions and solvents molecules have been omitted for clarity .....                                           | 4 |
| Figure S2. UV-vis spectra of T-1, T-2 and T-3 ( $1 \times 10^{-5}$ M) in different solvents.....                                                                                    | 4 |
| Figure S3. Single-photon fluorescence spectra of T-1, T-2 and T-3 ( $1.0 \times 10^{-5}$ M) in different solvents.....                                                              | 5 |
| Fluorescence quantum yield .....                                                                                                                                                    | 5 |
| The Lippert-Mataga equation .....                                                                                                                                                   | 5 |
| Two photon absorption cross section ( $\delta$ ).....                                                                                                                               | 6 |
| Figure S4. Output fluorescence ( $I_0$ ) vs. the square of input laser power ( $I_F$ ) <sup>2</sup> at 760nm for T-1, T-2 and T-3 in DMF.....                                       | 7 |
| Figure S5. Two-photon excited fluorescence (TPEF) of T-1, T-2 and T-3 in DMF.....                                                                                                   | 6 |
| Figure S6. the two-photon excited fluorescence spectra of T-1, T-2 and T-3 (excitation wavelength at 760 nm, energy of 500 mW, $c = 1.0 \times 10^{-3}$ molL <sup>-1</sup> ) in DMF | 8 |
| Figure S7. Single-photon fluorescence spectra of T-1 ( $1.0 \times 10^{-5}$ M) with different pHs in water .....                                                                    | 8 |
| Figure S8. T-1 co-localizes to lysosomes in live HepG2 cells .....                                                                                                                  | 7 |
| Reference .....                                                                                                                                                                     | 8 |

**Table S1.** The crystal data collection and the refinement parameters of T-1 and T-3

|                             | T-1                            | T-3                        |
|-----------------------------|--------------------------------|----------------------------|
| Empirical formula           | C H1.73 N O0.03                | C36 H32 F6 N3 P            |
| Formula weight              | 28.2                           | 651.62                     |
| Temperature                 | 296(2)K                        | 298(2)K                    |
| Wavelength                  | 0.71073Å                       | 0.71069 Å                  |
| Crystal system, space group | Monoclinic, P2 <sub>1</sub> /n | Triclinic, P $\bar{1}$     |
| <i>a</i> /Å                 | 9.61(13)                       | 10.37(5)                   |
| <i>b</i> /Å                 | 9.26(13)                       | 14.01(5)                   |
| <i>c</i> /Å                 | 55.98(8)                       | 24.32(5)                   |
| Volume                      | 4975(12) Å <sup>3</sup>        | 3257(2) Å <sup>3</sup>     |
| Z, Calculated density       | 146, 1.374 Mg/m <sup>3</sup>   | 4, 1.329 Mg/m <sup>3</sup> |
| Absorption coefficient      | 0.097 mm <sup>-1</sup>         | 0.149 mm <sup>-1</sup>     |

| F(000)                             | 2182                                           | 1352                                           |
|------------------------------------|------------------------------------------------|------------------------------------------------|
| Crystal size                       | 0.30 × 0.20 × 0.10<br>mm                       | 0.30 × 0.20 × 0.10<br>mm                       |
| Theta range for data<br>collection | 1.46 to 25.00 deg.                             | 1.66 to 25.00 deg.                             |
| Limiting indices                   | -11 ≤ h ≤ 11,<br>-10 ≤ k ≤ 10,<br>-66 ≤ l ≤ 66 | -12 ≤ h ≤ 11,<br>16 ≤ k ≤ 16,<br>-28 ≤ l ≤ 27  |
| Reflections<br>collected/unique    | 29779 / 8315 [R(int)<br>= 0.0780]              | 23007 / 11327<br>[R(int) = 0.0253]             |
| Completeness to<br>theta=25.00     | 95.1 %                                         | 98.6 %                                         |
| Absorption<br>correction           | Semi-empirical from<br>equivalents             | Semi-empirical from<br>equivalents             |
| Max. and min.<br>transmission      |                                                | 0.9853 and 0.9567                              |
| Refinement method                  | Full-matrix<br>least-squares on F <sup>2</sup> | Full-matrix<br>least-squares on F <sup>2</sup> |
| Data / restraints /<br>parameters  | 8315 / 155 / 655                               | 11327 / 0 / 940                                |
| Final R indices<br>[I > 2σ(I)]     | R1 = 0.1147, wR2 =<br>0.3099                   | R1 = 0.0953, wR2 =<br>0.2858                   |
| R indices (all data)               | R1 = 0.1814, wR2 =<br>0.3488                   | R1 = 0.1442, wR2 =<br>0.3257                   |

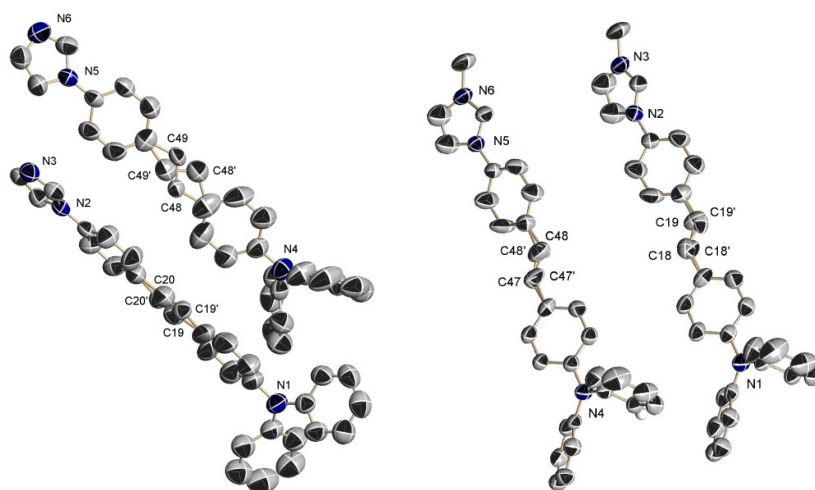

**Figure S1.** The crystal structures of T-1(left) and T-3(right). H atoms, anions and solvents molecules have been omitted for clarity

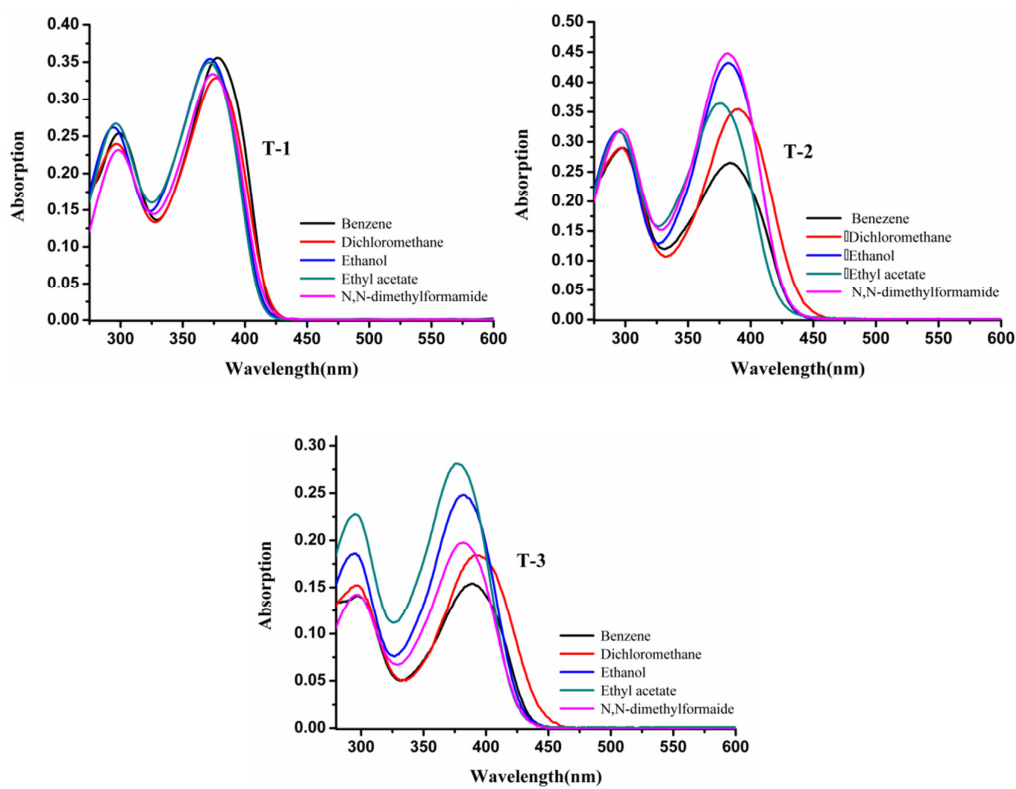

**Figure S2.** UV-vis spectra of T-1, T-2 and T-3 ( $1 \times 10^{-5}$  M) in different solvents

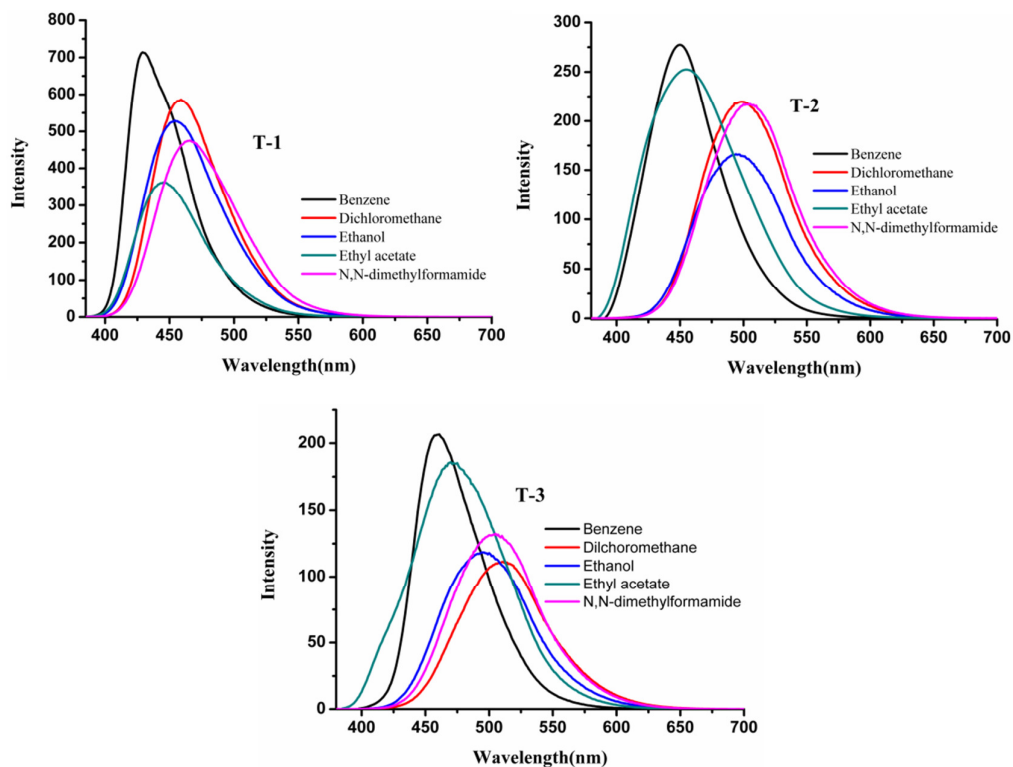

**Figure S3.** Single-photon fluorescence spectra of **T-1**, **T-2** and **T-3** ( $1.0 \times 10^{-5} \text{M}$ ) in different solvents

### Fluorescence quantum yield

The fluorescence quantum yields ( $\Phi$ ) were determined by using Rhodamine-B as the reference according to the literature method [1]. Quantum yields is corrected as follows:

$$\Phi_s = \Phi_r \frac{A_r \eta_s^2 D_s}{A_s \eta_r^2 D_r}$$

where the  $s$  and  $r$  indices designate the sample and reference samples, respectively,  $A$  is the absorbance at  $\lambda_{exc}$ ,  $\eta$  is the average refractive index of the appropriate solution, and  $D$  is the integrated area under the corrected emission spectrum[2] .

### The Lippert-Mataga equation

The Lippert-Mataga equation is as follow:

$$\Delta\nu = \frac{2\Delta f}{4\pi\epsilon_0\hbar ca^3}(\mu_e - \mu_g)^2 + b$$
$$\Delta f = \frac{\epsilon - 1}{2\epsilon + 1} - \frac{n^2 - 1}{2n^2 + 1}$$

in which  $\Delta\nu = \nu_{abs} - \nu_{em}$  stands for Stokes shift,  $\nu_{abs}$  and  $\nu_{em}$  are absorption and emission frequency ( $\text{cm}^{-1}$ ),  $\hbar$  is the Planck's constant,  $c$  is the velocity of light in vacuum,  $a$  is the Onsager radius and  $b$  is a constant.  $\Delta f$  is the orientation polarizability,  $\epsilon$  is the refractive index,  $n$  is the dielectric constant,  $\mu_e$  and  $\mu_g$  are the dipole moments of the emissive and ground states, respectively and  $\epsilon_0$  is the permittivity of the vacuum.  $(\mu_e - \mu_g)^2$  is proportional to the slope of the Lippert-Mataga plot.

### Two photon absorption cross section ( $\delta$ )

2PA cross sections ( $\delta$ ) of samples is determined by Eq.:

$$\delta = \delta_{ref} \frac{\Phi_{ref}}{\Phi} \frac{c_{ref}}{c} \frac{n_{ref}}{n} \frac{F}{F_{ref}}$$

Where the 'ref' subscript represents the reference molecule (here fluorescein in aqueous solution of sodium hydroxide (pH = 11) at a concentration of  $1.0 \times 10^{-3} \text{ mol L}^{-1}$  was used as the reference).  $\delta$  is the TPA cross-sectional value,  $c$  is the concentration of the solution,  $n$  is the refractive index of the solution,  $F$  is the 2PEF integral intensities of the solution emitted at the exciting wavelength, and  $\Phi$  is the fluorescence quantum yield. The  $\delta_{ref}$  value of reference was taken from the literature[3].

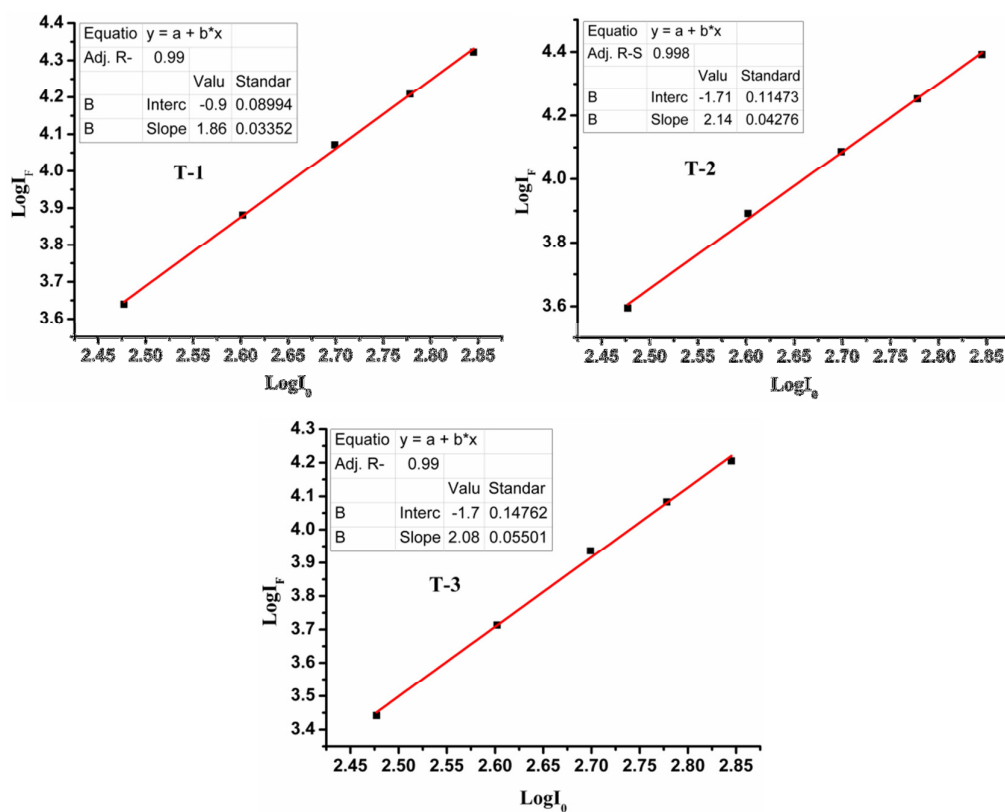

**Figure S4.** Output fluorescence ( $I_0$ ) vs. the square of input laser power ( $I_F$ )<sup>2</sup> at 760nm for **T-1**, **T-2** and **T-3** in DMF

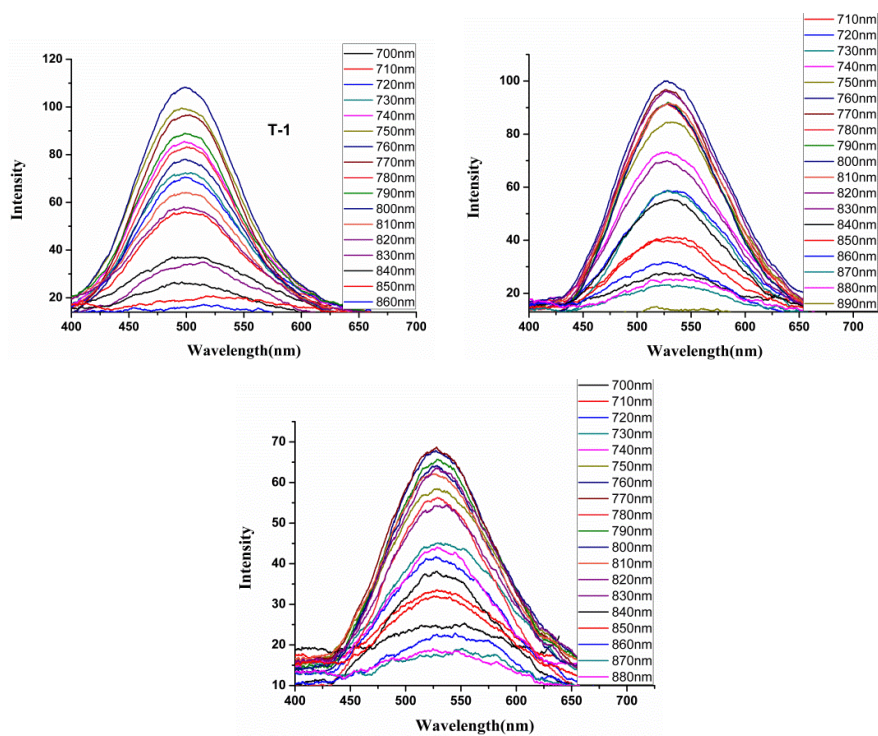

**Figure S5.** Two-photon excited fluorescence (TPEF) of **T-1**, **T-2**, and **T-3** in DMF

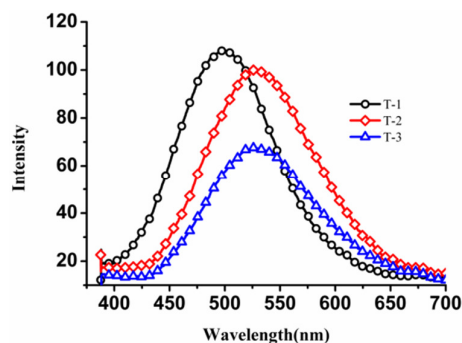

**Figure S6.** the two-photon excited fluorescence spectra of **T-1**, **T-2** and **T-3** (excitation wavelength at 760 nm, energy of 500 mW,  $c = 1.0 \times 10^{-3}$  molL<sup>-1</sup>) in DMF

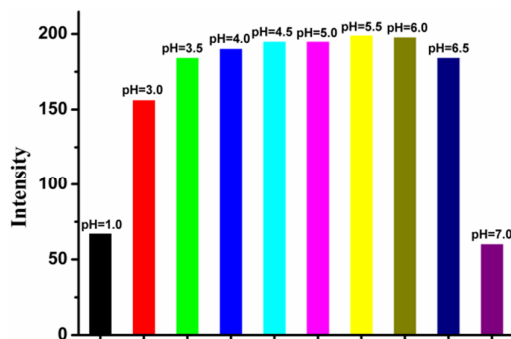

**Figure S7.** Single-photon fluorescence spectra of **T-1** ( $1.0 \times 10^{-5}$  M) with different pHs in water

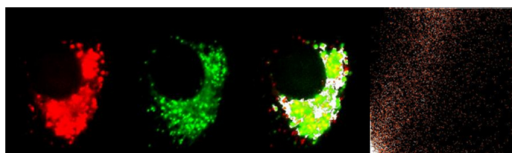

**Figure S8.** **T-1** co-localizes to lysosomes in live HepG2 cells

## Reference

- [1] a. Kubin RF, Fletcher AN. Fluorescence quantum yields of some rhodamine dyes[J]. Journal of Luminescence, 1983; 27(4): 455-462. b. Karstens T, Kobs K. Rhodamine B and



rhodamine 101 as reference substances for fluorescence quantum yield measurements. *The Journal of Physical Chemistry*, 1980; 84(14): 1871-1872.

[2] Gray TG, Rudzinski CM, Meyer EE, Holm R, Nocera DG. Spectroscopic and photophysical properties of hexanuclear rhenium (III) chalcogenide clusters. *Journal of the American Chemical Society*. 2003;125(16):4755-70.

[3] He GS, Tan LS, Zheng Q, Prasad, P. N. Multiphoton absorbing materials: molecular designs, characterizations, and applications. *Chemical reviews*, 2008; 108(4): 1245-1330.
